# Supplementary material for: Calculation of the relative metastabilities of proteins in subcellular compartments of Saccharomyces cerevisiae
Source: Springer Nature journal article supplement (doi:10.1186/1752-0509-3-75), 2009-07-18
Supplement: Additional file 10 [file 1752-0509-3-75-s10.pdf]

## **Additional File 10: Calculating the p-values for Spearman rank correlation**

The p-value is (Wikipedia): “the probability of obtaining a result at least as extreme as the one that was actually observed, assuming that the null hypothesis is true” or (math-world.wolfram.com): “the probability that a variate would assume a value greater than or equal to the observed value strictly by chance”. For the following analysis, the null hypothesis can be stated as: the observed value of the Spearman rank correlation coefficient is obtained (or surpassed) by a completely random ordering of the proteins. A low enough p-value is considered to be sufficient evidence to reject this hypothesis.

The p-value does not measure the significance of the correlations, but it might be useful in deciding whether a correlation exists at all. The p-values for the Spearman correlation coefficient calculated below can also help one interpret the relative weights of each of the correlations, which involve different numbers of proteins.

The p-value can be calculated exactly when the size of the data set is small enough. For example, when  $n = 3$ , the number of permutations is  $3!$ . Suppose we found a Spearman rank correlation coefficient of 1 (perfect positive rank correlation); an example is the outcome for the complex representing the ER compartment. There is only one permutation that leads to this outcome, so the p-value is  $1/3! = 0.1667$ . Traditionally, a p-value of 0.05 or lower is required to reject the null hypothesis. A perfect rank correlation among only 3 data points is not as convincing as a perfect rank correlation among 4 data points (e.g. the complex representing the ER to Golgi), which entails a p-value of  $1/4! = 0.042$ .

The exact calculation of the p-value is limited by available computational power, and in the present study was calculated for  $n < 10$ . Consider the case when  $n = 10$ , where the number of permutations is  $10! = 3,628,800$  (e.g. complex 11 representing the Golgi compartment). In the present analysis up to 500,000 random permutations of the calculated relative abundances of proteins were generated, and the Spearman rank correlation coefficient calculated between these and the observed relative abundances. If the correlation coefficient was equal to or greater than (for positive correlations only) or less than (for negative correlations only - i.e., the Golgi complex) that for the original set of abundances, the random sample was counted in the numerator of the p-value calculation. When done three times (500,000 random samples each), p-values of 0.45784, 0.45976 and 0.46116 were obtained in this case (second Table of this supplement).

This analysis supports the interpretation that there is a salient rank correlation between calculated and observed relative abundances of proteins in some of the cases studied here. Some of the strongest positive correlations are found in the model proteins from cell periphery, mitochondrion, and vacuolar membrane, and among the complexes, those selected to represent nucleolus, nuclear periphery and punctate composite. Among the negative rank correlations, only the most abundant proteins in Golgi, and the proteins in the selected complexes for cytoplasm and microtubule, are significant at a p-value cutoff of 0.05.

Table 1: Summary of Spearman rank correlation coefficients and p-values in comparisons of calculated and observed relative abundances of most abundant proteins in compartments. Abbreviations:  $n$  - number of data points;  $\rho$  - Spearman rank correlation coefficient; p.exact - exactly calculated p-value; p1–p3 - p-values calculated from random permutations; p.avg - average of p1–p3; factorial - factorial of  $n$ ; n.samp - number of random permutations tested.

| location           | $n$ | $\rho$ | p.exact | p1    | p2    | p3    | p.avg | factorial       | n.samp |
|--------------------|-----|--------|---------|-------|-------|-------|-------|-----------------|--------|
| actin              | 22  | 0.191  | NA      | 0.196 | 0.196 | 0.196 | 0.196 | 1.12E+21        | 500000 |
| ambiguous          | 50  | 0.419  | NA      | 0.001 | 0.001 | 0.001 | 0.001 | 3.04E+64        | 500000 |
| bud                | 50  | -0.015 | NA      | 0.459 | 0.459 | 0.46  | 0.459 | 3.04E+64        | 500000 |
| bud.neck           | 11  | 0.018  | NA      | 0.485 | 0.483 | 0.484 | 0.484 | 39916800        | 500000 |
| cell.periphery     | 38  | 0.417  | NA      | 0.005 | 0.005 | 0.005 | 0.005 | 5.23E+44        | 500000 |
| cytoplasm          | 50  | 0.188  | NA      | 0.096 | 0.095 | 0.096 | 0.095 | 3.04E+64        | 500000 |
| early.Golgi        | 9   | 0.45   | 0.115   | 0.115 | 0.115 | 0.114 | 0.115 | 362880          | 50000  |
| endosome           | 30  | 0.277  | NA      | 0.069 | 0.069 | 0.069 | 0.069 | 2.65E+32        | 500000 |
| ER                 | 49  | 0.033  | NA      | 0.412 | 0.412 | 0.412 | 0.412 | 6.08E+62        | 500000 |
| ER.to.Golgi        | 5   | 0.4    | 0.258   | 0.235 | 0.258 | 0.26  | 0.251 | 120             | 1000   |
| Golgi              | 14  | -0.543 | NA      | 0.024 | 0.024 | 0.024 | 0.024 | 87178291200     | 500000 |
| late.Golgi         | 29  | 0.166  | NA      | 0.195 | 0.194 | 0.193 | 0.194 | 8.84E+30        | 500000 |
| lipid.particle     | 17  | 0.227  | NA      | 0.19  | 0.189 | 0.19  | 0.19  | 355687428096000 | 500000 |
| microtubule        | 10  | 0.358  | NA      | 0.157 | 0.157 | 0.157 | 0.157 | 3628800         | 500000 |
| mitochondrion      | 50  | 0.457  | NA      | 0     | 0     | 0.001 | 0     | 3.04E+64        | 500000 |
| nuclear.periphery  | 46  | 0.317  | NA      | 0.016 | 0.016 | 0.016 | 0.016 | 5.50E+57        | 500000 |
| nucleolus          | 50  | 0.177  | NA      | 0.109 | 0.108 | 0.11  | 0.109 | 3.04E+64        | 500000 |
| nucleus            | 50  | -0.018 | NA      | 0.45  | 0.451 | 0.451 | 0.451 | 3.04E+64        | 500000 |
| peroxisome         | 18  | 0.563  | NA      | 0.008 | 0.008 | 0.008 | 0.008 | 6.40E+15        | 500000 |
| punctate.composite | 49  | 0.194  | NA      | 0.09  | 0.091 | 0.091 | 0.09  | 6.08E+62        | 500000 |
| spindle.pole       | 30  | 0.116  | NA      | 0.27  | 0.271 | 0.27  | 0.27  | 2.65E+32        | 500000 |
| vacuolar.membrane  | 45  | 0.475  | NA      | 0.001 | 0.001 | 0.001 | 0.001 | 1.19E+56        | 500000 |
| vacuole            | 50  | 0.228  | NA      | 0.056 | 0.056 | 0.056 | 0.056 | 3.04E+64        | 500000 |

Table 2: Summary of Spearman rank correlation coefficients and p-values in comparisons of calculated and observed relative abundances of proteins in complexes. Abbreviations:  $n$  - number of data points;  $\rho$  - Spearman rank correlation coefficient; p.exact - exactly calculated p-value; p1–p3 - p-values calculated from random permutations; p.avg - average of p1–p3; factorial - factorial of  $n$ ; n.samp - number of random permutations tested.

| location           | $n$ | $\rho$ | p.exact | p1    | p2    | p3    | p.avg | factorial     | n.samp |
|--------------------|-----|--------|---------|-------|-------|-------|-------|---------------|--------|
| actin              | 5   | -0.1   | 0.475   | 0.472 | 0.465 | 0.485 | 0.474 | 120           | 1000   |
| ambiguous          | 7   | 0.5    | 0.133   | 0.133 | 0.144 | 0.123 | 0.133 | 5040          | 5000   |
| bud                | 5   | -0.3   | 0.342   | 0.348 | 0.297 | 0.32  | 0.322 | 120           | 1000   |
| bud.neck           | 6   | 0.657  | 0.088   | 0.087 | 0.098 | 0.075 | 0.087 | 720           | 1000   |
| cell.periphery     | 4   | 0.2    | 0.458   | 0.446 | 0.446 | 0.46  | 0.451 | 24            | 1000   |
| cytoplasm          | 7   | -0.821 | 0.017   | 0.016 | 0.017 | 0.019 | 0.017 | 5040          | 5000   |
| early.Golgi        | 4   | -0.8   | 0.167   | 0.166 | 0.166 | 0.178 | 0.17  | 24            | 1000   |
| endosome           | 4   | -0.8   | 0.167   | 0.161 | 0.159 | 0.151 | 0.157 | 24            | 1000   |
| ER                 | 3   | 1      | 0.167   | 0.166 | 0.173 | 0.187 | 0.175 | 6             | 1000   |
| ER.to.Golgi        | 4   | 1      | 0.042   | 0.035 | 0.048 | 0.054 | 0.046 | 24            | 1000   |
| Golgi              | 10  | -0.042 | NA      | 0.458 | 0.46  | 0.461 | 0.46  | 3628800       | 50000  |
| late.Golgi         | 5   | 0.6    | 0.175   | 0.171 | 0.17  | 0.181 | 0.174 | 120           | 1000   |
| lipid.particle     | 12  | -0.189 | NA      | 0.276 | 0.277 | 0.275 | 0.276 | 479001600     | 50000  |
| microtubule        | 7   | -0.75  | 0.033   | 0.033 | 0.036 | 0.036 | 0.035 | 5040          | 5000   |
| mitochondrion      | 17  | 0.304  | NA      | 0.117 | 0.117 | 0.119 | 0.118 | 3.55E+14      | 50000  |
| nuclear.periphery  | 23  | 0.525  | NA      | 0.005 | 0.005 | 0.006 | 0.006 | 2.58E+22      | 50000  |
| nucleolus          | 6   | 1      | 0.001   | 0.001 | 0     | 0     | 0     | 720           | 1000   |
| nucleus            | 5   | 0.9    | 0.042   | 0.047 | 0.029 | 0.052 | 0.043 | 120           | 1000   |
| peroxisome         | 8   | 0.571  | 0.076   | 0.081 | 0.075 | 0.072 | 0.076 | 40320         | 5000   |
| punctate.composite | 15  | 0.636  | NA      | 0.007 | 0.007 | 0.006 | 0.006 | 1307674368000 | 50000  |
| spindle.pole       | 5   | 0.8    | 0.067   | 0.081 | 0.059 | 0.062 | 0.067 | 120           | 1000   |
| vacuolar.membrane  | 15  | 0.504  | NA      | 0.028 | 0.029 | 0.028 | 0.028 | 1307674368000 | 50000  |
| vacuole            | 9   | 0.517  | 0.081   | 0.082 | 0.082 | 0.081 | 0.082 | 362880        | 50000  |
